1  
2  
3  
4  
5  
6  
7  
8  
9  
10  
11  
12  
13  
14  
15  
16  
17  
18  
19  
20

# Physical activity predicts population-level age-related differences in frontal white matter

---

**Authors:** Juho M. Strömmer<sup>1</sup>, Simon W. Davis<sup>2</sup>, Richard N. Henson<sup>4</sup>, Lorraine K. Tyler<sup>3</sup>, Cam-  
CAN<sup>3,4</sup> & Karen L. Campbell<sup>5</sup>

**Authors' Affiliations:** 1. Department of Psychology, University of Jyväskylä, Finland; 2. Neurology, Duke University School of Medicine, Durham, USA; 3. Department of Psychology, University of Cambridge, Cambridge, UK; 4. Medical Research Council Cognition and Brain Sciences Unit, University of Cambridge, UK; 5. Department of Psychology, Brock University, St. Catharines, Canada.

**Corresponding Author:** Juho M. Strömmer  
University of Jyväskylä, Department of Psychology,  
P.O. Box 35, FI-40014, University of Jyväskylä, Finland  
Tel: +358 (0) 44 287 1873  
Email: juho.strommer@jyu.fi

21 **Abstract**

22 Physical activity has positive effects on brain health and cognitive function throughout the  
23 lifespan. Thus far, few studies have examined the effects of physical activity on white matter  
24 (WM) microstructure and psychomotor speed within the same, population-based sample (critical  
25 if conclusions are to extend to the wider population). Here, using diffusion tensor imaging and a  
26 simple reaction time task within a relatively large population-derived sample (N = 399; 18–87  
27 years) from the Cambridge Centre for Ageing and Neuroscience (Cam-CAN), we demonstrate  
28 that physical activity mediates the effect of age on white matter integrity, measured with  
29 fractional anisotropy. Higher self-reported daily physical activity was associated with greater  
30 preservation of WM in several frontal tracts, including the genu of corpus callosum, uncinate  
31 fasciculus, external capsule and anterior limb of the internal capsule. We also show that the age-  
32 related slowing is mediated by WM integrity in the genu. Our findings contribute to a growing  
33 body of work suggesting that a physically active lifestyle may protect against age-related  
34 structural disconnection and slowing.

35

36 **Keywords:** brain aging, exercise, cognitive decline

## 37 **1. Introduction**

38 Ageing is associated with profound changes in brain structure, including grey matter atrophy and  
39 alterations in the integrity of white matter (WM). Microstructural changes in the intra- and  
40 extracellular components of WM occur throughout the ageing brain, but tend to be more  
41 pronounced in frontal associative tracts<sup>1-3</sup>. These age-related changes are thought to be driven  
42 largely by changes in myelin, with axon fibres being relatively unaffected by age<sup>4</sup>. Fractional  
43 anisotropy (FA), an index of microstructural white matter integrity that is sensitive to changes in  
44 cerebral myelin levels, as indexed by post mortem histology<sup>5</sup> declines progressively with age in  
45 healthy adults, especially in those white matter tracts that mature later in life, such as anterior  
46 parts of corpus callosum<sup>6</sup>.

47 This loss of myelin integrity is considered one of the key mechanisms underlying normal age-  
48 related variability in cognitive performance<sup>1,7</sup>, often surpassing grey matter volume estimates in  
49 the ability to account for age-related cognitive decline<sup>8</sup>. Increased WM integrity is often  
50 positively correlated with better performance across a number of cognitive domains and, in some  
51 circumstances, WM integrity mediates age-related slowing of cognitive processing<sup>9-13</sup>. In fact, a  
52 substantial portion of the age-related variance in cognitive processing speed has been shown to  
53 be attributable to decreases in frontal WM integrity<sup>4,14</sup>. The role of WM structures like the genu  
54 of corpus callosum in mediating the effect of age on cognitive processing speed has now been  
55 replicated many times<sup>3,13</sup> and this relationship appears to be specific to processing speed and  
56 executive functioning, rather than other aspects of cognition (e.g. language, motor functioning)  
57<sup>11</sup>. Thus, maintenance of WM structural connectivity appears to be particularly critical for the  
58 prevention of general age-related slowing. However, despite the ubiquity and cognitive relevance

59 of these patterns of change in cerebral white matter, the specific mediators explaining these  
60 effects—beyond chronological age itself—are unclear.

61 While several lifestyle factors likely contribute to the maintenance of WM integrity with age,  
62 one of the most robust predictors of WM health appears to be physical activity. High  
63 cardiorespiratory fitness and engagement in physical activity have been shown to have protective  
64 effects for WM integrity<sup>15–17</sup> and cognitive performance<sup>18–20</sup> in healthy older adults. Evidence  
65 from prospective studies also indicate that physical activity considerably reduces the risk of  
66 dementia and Alzheimer’s disease<sup>21</sup>. Interestingly, Burzynska et al.<sup>23</sup> showed that not only  
67 engagement in physical activity, but also avoiding sedentary behaviour, is important for  
68 preserving WM microstructural integrity later in life, possibly via different pathways. Sedentary  
69 lifestyle is more likely to be associated with obesity and poor aerobic fitness, and is a leading  
70 cause of disease and disability<sup>23</sup>, which in turn, are shown to be associated with lower WM  
71 integrity<sup>24</sup>. Longitudinal data from aerobic exercise intervention programs in older adults show  
72 that the selective increases in fitness associated with aerobic exercise, but not low-intensity  
73 control interventions, predict increases in WM integrity in the prefrontal and temporal cerebrum  
74<sup>25</sup> and increases WM volume in the anterior corpus callosum<sup>26</sup>. As noted above, these brain  
75 regions are particularly vulnerable to the detrimental effects of age. Together, these studies  
76 emphasize the potential benefits of physical activity in preventing age-related white matter loss.

77 While several studies suggest a link between exercise and differences in WM integrity with age  
78<sup>25,27</sup>, it remains to be seen whether this relationship holds within a large, population-based  
79 lifespan sample. Population-based samples are critical if our conclusions are to extend beyond  
80 relatively select (and potentially biased) samples of research volunteers to the population in  
81 general. Moreover, few studies, if any, have examined the relationship between brain health and

82 participants' reports of everyday activities and routines (encompassing such activities as cleaning  
83 the house and mode of transportation/distance to work), which arguably offer a more  
84 ecologically valid counterpoint to standard intervention studies <sup>28</sup>. In this study, we examined the  
85 relationship between age, self-reported physical activity, WM microstructure, and processing  
86 speed within a large, population-based sample from the Cambridge Centre for Ageing and  
87 Neuroscience (Cam-CAN) <sup>29</sup>. Participants (N = 399) completed a physical activity questionnaire  
88 <sup>30</sup> and series of cognitive tests, including simple reaction time (RT) task in their homes, before  
89 undergoing a series of structural and functional MRI scans, which included diffusion tensor  
90 imaging, DTI <sup>29</sup>. DTI was used to estimate fractional anisotropy (FA) within 21 major tracts  
91 from the John Hopkins University (JHU) White Matter Atlas and related to physical activity and  
92 processing speed separately in a series of mediation models.

93 Our first objective was to determine whether physical activity mediates age-related decline in  
94 WM within particular tracts, and whether these are the tracts that are most susceptible to age-  
95 related decline. To this end, separate mediation models were run for each tract, testing whether  
96 the relationship between age and FA was mediated by daily physical activity. Our second  
97 objective was to examine whether performance on the simple RT task is associated with WM  
98 integrity and whether the age-related decline in this measure is mediated by WM integrity. Only  
99 those tracts that showed a significant mediation effect of physical activity in the first model  
100 (corrected for multiple comparisons), were included into the second set of models testing the  
101 association between age, FA and RT. Thus, our planned analyses will help to elucidate a possible  
102 explanation for age-related declines in white matter health and provide evidence for the role of  
103 this measure in predicting declines in processing speed.

## 104 **2. Methods**

### 105 ***2.1 Subjects***

106 A healthy, population-based sample of 708 participants (age range 18 – 88 years), was collected  
107 as part of the Cambridge Centre for Ageing and Neuroscience (Cam-CAN; for detailed  
108 description of the study, see Shafto et al., 2014). The ethical approval for the study was obtained  
109 from the Cambridgeshire 2 (now East of England - Cambridge Central) Research Ethics  
110 Committee. Participants gave written informed consent. Exclusion criteria included poor vision  
111 (below 20/50 on Snellen test<sup>32</sup>), poor hearing (failing to hear 35dB at 1000Hz in either ear), low  
112 MMSE (24 or lower<sup>32</sup>, self-reported substance abuse (assessed by the Drug Abuse Screening  
113 Test (DAST-20; Skinner, 1982), poor English knowledge (non-native or non-bilingual English  
114 speaker), current psychiatric disorder or neurological disease. Additionally, people with  
115 contraindications to MRI or MEG were excluded. Handedness was assessed using Edinburgh  
116 Handedness Inventory<sup>34</sup>. Of the initial 708, 646 participants had valid T1, T2 and DTI/DKI data.  
117 We also excluded participants who did not complete the RT task (N = 75), and those with  
118 outlying FA values further than 3 times interquartile range above or below the age decile mean  
119 (N = 25; total remaining N = 399, 221 females, age range 18 to 87 years). The sample  
120 characteristics are described in Table 1.

### 121 ***2.2 Imaging pre-processing and region-wise analysis***

122 The MRI data were collected from a Siemens 3T TIM TRIO (Siemens, Erlangen, Germany). To  
123 estimate white matter integrity (WMI), diffusion-weighted images were acquired with a twice-  
124 refocused-spin-echo sequence, with 30 diffusion gradient directions each for b-values 1,000 and  
125 2,000 s mm<sup>-2</sup>, and three images acquired using a b-value of 0 (TE = 104 ms, TR = 9.1 s, voxel

126 size =  $2 \times 2 \times 2 \text{ mm}^3$ , field of view (FOV) =  $192 \times 192 \text{ mm}^2$ , 66 axial slices, GRAPPA  
127 acceleration factor = 2).

128 All pre-processing was completed using a combination of functions from FSL version 4.1.8 (*bet*,  
129 *eddy*, *dtifit*, and *TBSS*) and custom MATLAB scripts. The diffusion data were pre-processed for  
130 eddy currents and subject motion using an affine registration model. After removal of non-brain  
131 tissue, a non-linear diffusion tensor model was fit to the DWI volumes. Non-linear fitting of the  
132 diffusion tensor provides a more accurate noise modelling than standard linear model fitting and  
133 enables various constraints on the diffusion tensor, such as positive definiteness. The tensor's  
134 eigensystem was used to compute the fractional anisotropy (FA) at each voxel; FA maps were  
135 spatially normalized into a standard stereotactic space using tract-based spatial statistics<sup>35</sup>.  
136 Images were then smoothed with a 6 mm full width at half maximum Gaussian kernel to address  
137 possible residual errors and inter-individual variability and to ensure the normality requirements  
138 of parametric statistics were met, and then masked with a binarised version of each participant's  
139 FA map, such that voxels below an FA threshold of 0.35 were not considered for further  
140 analysis.

141 Next, the mean FA values over 21 bilaterally symmetrical tract ROIs from the JHU White Matter  
142 Atlas (<http://cmrm.med.jhmi.edu/>) were extracted for subsequent analysis: genu of corpus  
143 callosum, body of corpus callosum, splenium of corpus callosum, column and body of fornix,  
144 fornix (cres), cerebral peduncle, anterior limb of internal capsule, posterior limb of internal  
145 capsule, retrolenticular part of internal capsule, anterior corona radiata, superior corona radiate,  
146 posterior corona radiate, posterior thalamic radiation, sagittal stratum, external capsule, cingulate  
147 gyrus, hippocampus, superior longitudinal fasciculus, superior fronto-occipital fasciculus,  
148 uncinate fasciculus and tapetum.

### 149 **2.3 Physical activity questionnaire**

150 Information about physical activity energy expenditure (PAEE) was gathered as part of a larger  
151 self-completed questionnaire, which asked about education, training, travel, hobbies, and social  
152 activities. The questions about physical activity were based on items from the European  
153 Prospective Investigation into Cancer Study-Norfolk Physical Activity Questionnaire (EPIC-  
154 EPAQ2<sup>30</sup>. The full questionnaire is provided in Supplementary Information. Individual total  
155 PAEE per day (kJ/day/kg) was calculated from self-reported activities into metabolic equivalents  
156 (METs)<sup>36,37</sup>, based on the standard definition of 1 MET as 3.5 ml O<sub>2</sub> per min per kg (or 71  
157 J/min/kg) based on the resting metabolic rate<sup>38</sup>. In addition, PAEE was divided into subtypes in  
158 relation to the nature of the activity in order to investigate their contribution to total PAEE and  
159 age-related differences in it. Work PAEE includes all activities performed at work; Home PAEE  
160 includes home and housework-related activity; Leisure PAEE includes all voluntary leisure  
161 activity and exercise; and Commute PAEE includes commuting to work and other travel.

### 162 **2.4 Response time task**

163 In the simple RT task, participants were seated behind a computer screen and rested their right  
164 hand on a response box with four buttons (one for each finger). On the screen, they viewed an  
165 image of a hand with blank circles above each finger. Participants were instructed to press with  
166 the index finger as quickly as possible whenever the circle above the index finger in the image  
167 turned black. On pressing the button, or after maximum 3 seconds, the circle became blank  
168 again, and the variable inter-trial interval began. The inter-trial interval varied pseudo-randomly  
169 with positively skewed distribution, minimum 1.8 seconds, mean 3.7 seconds, median 3.9  
170 seconds, and maximum 6.8 seconds. The task included 50 trials and mean RT was calculated for  
171 correct trials after applying a 3 SD trim to the data.



## 172 **2.5 Statistical analysis**

173 Pearson's correlation coefficients (partialling out gender and education) were computed to  
174 examine the relationship between age and total PAEE. For the PAEE subtypes (which were  
175 skewed in their distributions), Spearman's rank correlation coefficients were computed  
176 (partialling out gender and education) to examine age-related changes in the types of activity  
177 contributing to total PAEE.

178 In order to test whether physical activity helps to predict the effects of age-related WM decline,  
179 we ran a series of mediation analyses, in which a third mediator variable fully or partially  
180 accounts for the relationship between an independent predictor and dependent outcome variables  
181 <sup>39</sup>. In each analysis, the independent factor was age, the dependent factor was one of the 21 white  
182 matter tracts (i.e., mean FA within a tract) and the mediator was the amount of physical activity  
183 (Figure 2D). For those tracts that showed a significant mediation effect, we went on to test the  
184 cognitive significance of that effect by examining the relationship between WM in those tracts  
185 and age-related slowing (Figure 2). To this end, we ran another set of mediation analyses using  
186 age as the independent factor, simple RT as the dependent factor and mean FA within each of the  
187 previously identified tracts as the mediator (Figure 2E). Direct effects of age on FA and RT were  
188 also included in these regressions. Statistical significance for mediation analyses is typically  
189 signified by a significant attenuation of the relationship (beta value) between predictor and  
190 outcome variables, denoted here by a 95% confidence interval (CI) for standardized regression  
191 coefficient that does not cross zero. All significance tests were two-tailed and False Discovery  
192 Rate (FDR) <sup>40</sup> at 0.05 was applied to protect against familywise Type I error.

### 193 **3. Results**

#### 194 ***3.1 Ageing and physical activity***

195 Total PAEE, controlled for gender and education, showed a gradual decline with age:  $r = -0.37$ ,  $p_{\text{fdr}} < .001$  (Figure 1A). This is also shown in the results of the mediation models as path  $a$ , i.e.,  
196  $p_{\text{fdr}} < .001$  (Figure 1A). This is also shown in the results of the mediation models as path  $a$ , i.e.,  
197 the direct negative effect of age on total PAEE (Table 2). Work-related activity ( $\rho = -0.52$ ,  $p_{\text{fdr}} < .001$ ) and commuting-related activity ( $\rho = -0.46$ ,  $p_{\text{fdr}} < .001$ ) showed moderate negative  
198  $< .001$ ) and commuting-related activity ( $\rho = -0.46$ ,  $p_{\text{fdr}} < .001$ ) showed moderate negative  
199 correlations with increasing age, but home-related activity showed a very weak correlation ( $\rho =$   
200  $-0.099$ ,  $p_{\text{fdr}} = .06$ ) and leisure time activity no correlation ( $\rho = -0.09$ ,  $p_{\text{fdr}} = .09$ ) with age  
201 (Figure 1B). To conclude, leisure and home related activity seem to remain stable across the  
202 lifespan, while work and commuting-related activity decline and likely contribute to the decline  
203 in total PAEE.

#### 204 ***3.2 Ageing and white matter integrity***

205 The direct effect of age on FA was negative in all of the analysed tracts, except the posterior  
206 limb of internal capsule, which showed a small age-related increase in FA (Table 2, path  $c$ ). The  
207 effect of age on FA was relatively large (standardized betas [ $\beta$ 's]  $< -.5$ ) in the genu and body of  
208 the corpus callosum, fornix, anterior corona radiata, posterior thalamic radiation, sagittal stratum  
209 and tapetum (Figure 2A and 2C).

#### 210 ***3.3 Physical activity and white matter integrity***

211 The first mediation analyses tested whether total PAEE mediated the age-FA relationships. Four  
212 tracts showed a mediation effect that survived FDR correction: genu of corpus callosum, anterior  
213 limb of internal capsule, external capsule and uncinate fasciculus (Table 2, path  $ab$ , Figure 2A  
214 and 2C). The mediation effects of PAEE on these WM tracts are positive (Table 2, path  $ab$ ),

215 suggesting that higher physical activity is associated with less age-related white matter  
216 degeneration (see Figure 2A). No mediation effects were found when different PAEE types were  
217 used as mediator instead of total PAEE.

### 218 ***3.4 White matter integrity and speed of processing***

219 The second mediation analyses tested whether FA (in the tracts related to exercise) mediated the  
220 relationship between age and processing speed. As expected, age was associated with slower  
221 responding on the simple RT task:  $B = .362$ ,  $CI = .273, .452$   $SE = .047$  (Table 3, path  $c$ ).  
222 Critically, mean FA in the genu of corpus callosum (GCC) significantly mediated the effect of  
223 age on RT ( $ab = .150$ ,  $CI = .045, .251$ ,  $SE = .050$ ; Table 3, path  $ab$ , Figure 2B), suggesting that  
224 preservation of white matter in the GCC is associated with less age-related slowing (Figure 2B).  
225 None of the other tracts showed significant mediation or main effects (Table 3, path  $ab$  and  $c$ ).<sup>1</sup>

---

<sup>1</sup> These effects remain equal when controlling for gender and education, although gender has a direct effect on FA in anterior limb of internal capsule ( $B = -.426$ ,  $SE = .096$ , 95%  $CI = -.616 - -.237$ ).

## 226 **4. Discussion**

227 This study had two major aims. First, we examined whether physical activity mediates the effects  
228 of age on WM integrity. In line with previous work, we found higher physical activity to have  
229 positive effects that may protect against the damaging effects of age on FA in anterior WM  
230 tracts, namely the genu of corpus callosum, uncinate fasciculus, anterior limb of internal capsule  
231 and external capsule. The second aim of this study was to examine whether WM integrity within  
232 the tracts that benefit from physical activity mediate age-related slowing of processing speed. Of  
233 the four tracts tested, only the genu of the corpus callosum mediated a significant portion of the  
234 variance between age and RT on a simple motor task.

235 This is the first study, to our knowledge, to show a relationship between self-reported everyday  
236 activities and FA in a population-based sample. While our results rely on a cross-sectional  
237 sample, and thus cannot relate physical activity to rates of longitudinal change, these results  
238 suggest that those who are more physically active in their day-to-day lives also have more youth-  
239 like patterns of WM microstructure. This is consistent with previous studies focusing on healthy  
240 older individuals, which have linked higher self-reported physical activity to higher WM volume  
241 <sup>41</sup> and lesser WM atrophy <sup>16</sup>. Objectively measured cardiorespiratory fitness has also been shown  
242 to be associated with FA in the cingulum <sup>24</sup> and large portion of the corpus callosum (Johnson et  
243 al., 2012) in older adults. A recent study with two large samples of older adults demonstrated  
244 that white matter tracts between prefrontal regions and medial temporal lobe are particularly  
245 associated with cardiorespiratory fitness, and that these associations mediate spatial working  
246 memory performance <sup>42</sup>. In our sample, which covers the whole adult age-range from 18 to 87  
247 years, higher everyday physical activity was associated with less age-related loss of WM in  
248 several adjacent anterior tracts. Similarly, a recent study showed that higher cardiorespiratory

249 fitness, assessed with the maximum volume of oxygen uptake (peak  $\text{VO}_2$ ), is related to higher  
250 FA in several WM tracts in older adults<sup>43</sup>. Their study found regional specificity in the  
251 sensitivity to cardiorespiratory fitness – including genu of corpus callosum as one of the  
252 responsive regions. As with the current results, they showed that not all WM tracts that decline  
253 with age are associated with cardiorespiratory fitness.

254 Overall, physical activity declined with increasing age. This appears to be due largely to a  
255 decrease in activity related to work and commuting, whereas home- and leisure-related activity  
256 remained relatively stable across the age span. These results are in line with a recent review  
257 concluding that in childhood, habituation to active lifestyle, like active travel or outdoor play, are  
258 important contributors to total daily physical activity, whereas in adulthood, life events have the  
259 greatest influence on physical activity behaviour<sup>44</sup>. In the present data, a drop in work-related  
260 activity around 60 years of age coincides with the mean retirement age in our sample. Thus, it  
261 may be that people whose everyday activity is highly dependent on the activities associated with  
262 work show the greatest drop in the total activity compared to those with an active lifestyle  
263 outside of working life. Thus, it seems particularly important to promote physical leisure  
264 activities amongst retired older adults, possibly with the help of societal actions.

265 Age-related slowing of cognitive processing has been proposed to underlie age-related declines  
266 within various domains of cognition<sup>45</sup>. In the current study, simple RT slowed gradually with  
267 increasing age, which is a common finding among various types of age-related effects on speed  
268 of processing<sup>46</sup>. Age-related slowing in RT was mediated by FA in the genu of corpus  
269 callosum, but not in the other tracts that related to physical activity. These findings are in line  
270 with an earlier study suggesting that WM deterioration in the anterior part of the corpus callosum  
271 may contribute to general age-related slowing<sup>3</sup>, though other studies have also related the

272 splenium of corpus callosum and anterior limb of internal capsule<sup>47</sup> and more global white  
273 matter structure<sup>13,48</sup> to perceptual-motor speed.

274 We acknowledge that our results do not speak to causality, since mediation analyses based on  
275 cross-sectional data do not inevitably represent causal relationships between age, physical  
276 activity, WM integrity and RT. Nevertheless, we assume that age, an independent factor in both  
277 of the mediation models, cannot be changed by the influence of other factors, and further, that  
278 psychomotor speed (RT) is a result of nervous system functioning (WM integrity), rather than  
279 the other way round<sup>49</sup>. However, the causal interaction between lifestyle factors (e.g., physical  
280 activity) and brain structure remains unclear: it is well known that environment and behaviour,  
281 including physical activity, can cause plastic changes in the brain, but at the same time, changes  
282 in brain structure and function are known to influence behaviour (i.e. willingness towards action  
283 demanding physical activity). Furthermore, the strength of such inferences, based on self-  
284 reported questionnaire data, are necessarily limited. While the reliability of such questionnaires  
285 is high<sup>50</sup>, their absolute validity is moderate at best. Thus, observations in large samples such as  
286 ours must be validated with more time-intensive vascular measures, such as VO<sub>2</sub> uptake and  
287 neuroimaging measures of cerebral perfusion.

288 To conclude, we found that self-reported levels of physical activity mediated age-related white  
289 matter loss in a number of anterior tracts. While bearing in mind the limitations of cross-  
290 sectional data and a mediation-based approach, our findings complement the evidence from  
291 previous work suggesting that a physically active lifestyle may have protective benefits against  
292 age-related structural disconnection and cognitive decline. The findings of this study further  
293 support public health recommendations about the benefits of leading a physically active lifestyle  
294 across the life span, including older adults.

## 295 **Author Contributions**

296 The principal personnel, including Lorraine K. Tyler, of the Cam-CAN project designed the  
297 study. Simon W. Davis and Juho M. Strömmer analysed the data. The interpretation of data was  
298 done by Juho M. Strömmer, Karen Campbell and Simon W. Davis. The manuscript was prepared  
299 by Juho M. Strömmer and revised by all the co-authors of this study. All of the authors approve  
300 the final version of the manuscript to be published.

## 301 **Funding**

302 This work was supported supported by the Biotechnology and Biological Sciences Research  
303 Council (grant number BB/H008217/1).

## 304 **Acknowledgements**

305 We are grateful to the Cam-CAN respondents and their primary care teams in Cambridge for  
306 their participation in this study. We also thank colleagues at the MRC Cognition and Brain  
307 Sciences Unit MEG and MRI facilities for their assistance. The Cam-CAN corporate author  
308 consists of the project principal personnel: Lorraine K Tyler, Carol Brayne, Edward T Bullmore,  
309 Andrew C Calder, Rhodri Cusack, Tim Dalgleish, John Duncan, Richard N Henson, Fiona E  
310 Matthews, William D Marslen-Wilson, James B Rowe, Meredith A Shafto; Research Associates:  
311 Karen Campbell, Teresa Cheung, Simon Davis, Linda Geerligs, Rogier Kievit, Anna McCarrey,  
312 Abdur Mustafa, Darren Price, David Samu, Jason R Taylor, Matthias Treder, Kamen Tsvetanov,  
313 Janna van Belle, Nitin Williams; Research Assistants: Lauren Bates, Tina Emery, Sharon  
314 Erzinçlioglu, Andrew Gadie, Sofia Gerbase, Stanimira Georgieva, Claire Hanley, Beth Parkin,  
315 David Troy; Affiliated Personnel: Tibor Auer, Marta Correia, Lu Gao, Emma Green, Rafael

316 Henriques; Research Interviewers: Jodie Allen, Gillian Amery, Liana Amunts, Anne Barcroft,  
317 Amanda Castle, Cheryl Dias, Jonathan Dowrick, Melissa Fair, Hayley Fisher, Anna Goulding,  
318 Adarsh Grewal, Geoff Hale, Andrew Hilton, Frances Johnson, Patricia Johnston, Thea  
319 Kavanagh-Williamson, Magdalena Kwasniewska, Alison McMinn, Kim Norman, Jessica  
320 Penrose, Fiona Roby, Diane Rowland, John Sargeant, Maggie Squire, Beth Stevens, Aldabra  
321 Stoddart, Cheryl Stone, Tracy Thompson, Ozlem Yazlik; and administrative staff: Dan Barnes,  
322 Marie Dixon, Jaya Hillman, Joanne Mitchell, Laura Willis.

### 323 **Declaration of Interest**

324 The authors declare that the research was conducted in the absence of any commercial or  
325 financial relationships that could be construed as a potential conflict of interest.



## 326 References

- 327 1. Madden DJ, Bennett IJ, Burzynska A, Potter GG, Chen N, Song AW. Diffusion tensor imaging of  
328 cerebral white matter integrity in cognitive aging. *Biochim Biophys Acta - Mol Basis Dis.*  
329 2012;1822(3):386-400. doi:10.1016/j.bbadis.2011.08.003.
- 330 2. Bennett IJ, Madden DJ, Vaidya CJ, Howard D V., Howard JH. Age-related differences in multiple  
331 measures of white matter integrity: A diffusion tensor imaging study of healthy aging. *Hum Brain*  
332 *Mapp.* 2009;31(3):NA-NA. doi:10.1002/hbm.20872.
- 333 3. Salami A, Eriksson J, Nilsson L-G, Nyberg L. Age-related white matter microstructural  
334 differences partly mediate age-related decline in processing speed but not cognition. *Biochim*  
335 *Biophys Acta - Mol Basis Dis.* 2012;1822(3):408-415. doi:10.1016/j.bbadis.2011.09.001.
- 336 4. Madden DJ, Spaniol J, Costello MC, et al. Cerebral white matter integrity mediates adult age  
337 differences in cognitive performance. *J Cogn Neurosci.* 2009;21:289-302.
- 338 5. Schmierer K, Wheeler-Kingshott CAM, Boulby PA, et al. Diffusion tensor imaging of post  
339 mortem multiple sclerosis brain. *Neuroimage.* 2007;35(2):467-477.  
340 doi:10.1016/j.neuroimage.2006.12.010.
- 341 6. Kochunov P, Williamson DE, Lancaster J, et al. Fractional anisotropy of water diffusion in  
342 cerebral white matter across the lifespan. *Neurobiol Aging.* 2012;33(1):9-20.  
343 doi:10.1016/j.neurobiolaging.2010.01.014.
- 344 7. Madden DJ, Bennett IJ, Song AW. Cerebral white matter integrity and cognitive aging:  
345 Contributions from diffusion tensor imaging. *Neuropsychol Rev.* 2009;19(4):415-435.  
346 doi:10.1007/s11065-009-9113-2.
- 347 8. Westlye LT, Walhovd KB, Dale AM, et al. Life-span changes of the human brain white matter:  
348 Diffusion tensor imaging (DTI) and volumetry. *Cereb Cortex.* 2010;20(9):2055-2068.  
349 doi:10.1093/cercor/bhp280.
- 350 9. Bennett IJ, Madden DJ. Disconnected aging: Cerebral white matter integrity and age-related  
351 differences in cognition. *Neuroscience.* 2014;276:187-205.  
352 doi:10.1016/j.neuroscience.2013.11.026.
- 353 10. Nilsson J, Thomas AJ, O'Brien JT, Gallagher P. White Matter and Cognitive Decline in Aging: A  
354 Focus on Processing Speed and Variability. *J Int Neuropsychol Soc.* 2014;20(3):262-267.  
355 doi:10.1017/S1355617713001458.
- 356 11. Gazes Y, Bowman FD, Razlighi QR, O'Shea D, Stern Y, Habeck C. White matter tract covariance  
357 patterns predict age-declining cognitive abilities. *Neuroimage.* 2015;125:53-60.  
358 doi:10.1016/j.neuroimage.2015.10.016.
- 359 12. Price D, Tyler LK, Neto Henriques R, et al. Age-related delay in visual and auditory evoked  
360 responses is mediated by white- and grey-matter differences. *Nat Commun.* 2017;8(May  
361 2016):15671. doi:10.1038/ncomms15671.
- 362 13. Kievit RA, Davis SW, Griffiths JD, Correia MM, Henson RNA. A watershed model of individual  
363 differences in fluid intelligence. *Neuropsychologia.* 2016;91:188-198. doi:10.1101/041368.
- 364 14. Kochunov P, Coyle T, Lancaster J, et al. Processing speed is correlated with cerebral health  
365 markers in the frontal lobes as quantified by neuroimaging. *Neuroimage.* 2010;49(2):1190-1199.  
366 doi:10.1016/j.neuroimage.2009.09.052.
- 367 15. Johnson NF, Kim C, Clasey JL, Bailey A, Gold BT. Cardiorespiratory fitness is positively  
368 correlated with cerebral white matter integrity in healthy seniors. *Neuroimage.* 2012;59(2):1514-

- 369 1523. doi:10.1016/j.neuroimage.2011.08.032.
- 370 16. Gow AJ, Bastin ME, Valde MC, et al. Neuroprotective lifestyles and the aging brain. *Neurology*.  
371 2012.
- 372 17. Oberlin LE, Verstynen TD, Burzynska AZ, et al. White matter microstructure mediates the  
373 relationship between cardiorespiratory fitness and spatial working memory in older adults.  
374 *Neuroimage*. 2015;(131):91-101. doi:10.1016/j.neuroimage.2015.09.053.
- 375 18. Colcombe S, Kramer AF. Fitness effects on the cognitive function of older adults: A meta-analytic  
376 study. *Psychol Sci a J Am Psychol Soc / APS*. 2003;14(2):125-130.
- 377 19. Sofi F, Valecchi D, Bacci D, et al. Physical activity and risk of cognitive decline: A meta-analysis  
378 of prospective studies. *J Intern Med*. 2011;269(1):107-117. doi:10.1111/j.1365-  
379 2796.2010.02281.x.
- 380 20. Sexton CE, Betts JF, Demnitz N, Dawes H, Ebmeier KP, Johansen-berg H. A systematic review of  
381 MRI studies examining the relationship between physical fitness and activity and the white matter  
382 of the ageing brain. *Neuroimage*. 2016;131:81-90. doi:10.1016/j.neuroimage.2015.09.071.
- 383 21. Hamer M, Chida Y. Physical activity and risk of neurodegenerative disease: a systematic review  
384 of prospective evidence. *Psychol Med*. 2009;39(1):3-11. doi:10.1017/S0033291708003681.
- 385 22. Burzynska AZ, Chaddock-Heyman L, Voss MW, et al. Physical Activity and Cardiorespiratory  
386 Fitness Are Beneficial for White Matter in Low-Fit Older Adults. *PLoS One*. 2014;9(9):e107413.  
387 doi:10.1371/journal.pone.0107413.
- 388 23. Bauer UE, Briss PA, Goodman RA, Bowman BA. Prevention of chronic disease in the 21st  
389 century: Elimination of the leading preventable causes of premature death and disability in the  
390 USA. *Lancet*. 2014;384(9937):45-52. doi:10.1016/S0140-6736(14)60648-6.
- 391 24. Marks B, Katz L, Styner M, Smith J. Aerobic fitness and obesity: relationship to cerebral white  
392 matter integrity in the brain of active and sedentary older adults. *Br J Sports Med*.  
393 2011;45(15):1208-1215. doi:10.1136/bjism.2009.068114.
- 394 25. Voss MW, Heo S, Prakash RS, et al. The influence of aerobic fitness on cerebral white matter  
395 integrity and cognitive function in older adults: Results of a one-year exercise intervention. *Hum*  
396 *Brain Mapp*. 2013;34(11):2972-2985. doi:10.1002/hbm.22119.
- 397 26. Colcombe SJ, Erickson KI, Scalf PE, et al. Aerobic exercise training increases brain volume in  
398 aging humans. *Journals Gerontol Ser a-Biological Sci Med Sci*. 2006;61(11):1166-1170.  
399 doi:61/11/1166.
- 400 27. Marks BL, Madden DJ, Bucur B, et al. Role of aerobic fitness and aging on cerebral white matter  
401 integrity. *Ann N Y Acad Sci*. 2007;1097:171-174. doi:10.1196/annals.1379.022.
- 402 28. Best JR, Rosano C, Aizenstein HJ, et al. Long-term changes in time spent walking and subsequent  
403 cognitive and structural brain changes in older adults. *Neurobiol Aging*. 2017;57:153-161.  
404 doi:10.1016/j.neurobiolaging.2017.05.023.
- 405 29. Shafto M a, Tyler LK, Dixon M, et al. The Cambridge Centre for Ageing and Neuroscience (Cam-  
406 CAN) study protocol: a cross-sectional, lifespan, multidisciplinary examination of healthy  
407 cognitive ageing. *BMC Neurol*. 2014;14(1):204. doi:10.1186/s12883-014-0204-1.
- 408 30. Wareham NJ, Jakes RW, Rennie KL, Mitchell J, Hennings S, Day NE. Validity and repeatability  
409 of the EPIC-Norfolk Physical Activity Questionnaire. *Int J Epidemiol*. 2002;31(1):168-174.  
410 doi:10.1093/ije/31.1.168.
- 411 31. Snellen H. *Probebuchstaben Zur Bestimmung Der Sehschärfte*. Utrecht, Van de Weijer; 1962.
- 412 32. Folstein MF, Folstein SE, McHugh PR. "Mini-mental state". A practical method for grading the

- 413 cognitive state of patients for the clinician. *J Psychiatr Res.* 1975;12(3):189-198. doi:0022-  
414 3956(75)90026-6 [pii].
- 415 33. Skinner HA. The drug abuse screening test. *Addict Behav.* 1982;7(4):363-371.
- 416 34. Oldfield RC. The assessment and analysis of handedness: the Edinburgh inventory.  
417 *Neuropsychologia.* 1971;9(1):97-113.
- 418 35. Peled S, Friman O, Jolesz F, Westin C-F. Geometrically constrained two-tensor model for crossing  
419 tracts in DWI. *Magn Reson Imaging.* 2006;24(9):1263-1270. doi:10.1016/j.mri.2006.07.009.
- 420 36. Ainsworth BE, Haskell WL, Herrmann SD, et al. 2011 Compendium of Physical Activities: a  
421 second update of codes and MET values. *Med Sci Sports Exerc.* 2011;43(8):1575-1581.  
422 doi:10.1249/MSS.0b013e31821e12.
- 423 37. Ainsworth BE, Haskell WL, Leon AS, et al. Compendium of physical activities: classification of  
424 energy costs of human physical activities. *Med Sci Sports Exerc.* 1993;25(1):71-80.  
425 <http://www.ncbi.nlm.nih.gov/pubmed/8292105>. Accessed May 26, 2015.
- 426 38. Henry C. Basal metabolic rate studies in humans: measurement and development of new  
427 equations. *Public Health Nutr.* 2005;8(March):1133-1152. doi:10.1079/PHN2005801.
- 428 39. Baron RM, Kenny D a. The Moderator-Mediator Variable Distinction in Social The Moderator-  
429 Mediator Variable Distinction in Social Psychological Research: Conceptual, Strategic, and  
430 Statistical Considerations. *J Pers Soc Psychol.* 1986;51(6):1173-1182. doi:10.1037/0022-  
431 3514.51.6.1173.
- 432 40. Benjamini Y, Hochberg Y. Benjamini Y, Hochberg Y. Controlling the false discovery rate: a  
433 practical and powerful approach to multiple testing. *J R Stat Soc B.* 1995;57(1):289-300.  
434 doi:10.2307/2346101.
- 435 41. Benedict C, Brooks SJ, Kullberg J, et al. Association between physical activity and brain health in  
436 older adults. *Neurobiol Aging.* 2013;34(1):83-90. doi:10.1016/j.neurobiolaging.2012.04.013.
- 437 42. Oberlin LE, Verstynen TD, Burzynska AZ, et al. White matter microstructure mediates the  
438 relationship between cardiorespiratory fitness and spatial working memory in older adults.  
439 *Neuroimage.* 2015. doi:10.1016/j.neuroimage.2015.09.053.
- 440 43. Hayes SM, Salat DH, Forman DE, Sperling RA, Verfaellie M. Cardiorespiratory fitness is  
441 associated with white matter integrity in aging. *Ann Clin Transl Neurol.* 2015;2(6):688-698.  
442 doi:10.1002/acn3.204.
- 443 44. Condello G, Puggina A, Aleksovska K, et al. Behavioral determinants of physical activity across  
444 the life course □: a “Determinants of Diet and Physical Activity” (DEDIPAC) umbrella  
445 systematic literature review. *Int J Behav Nutr Phys Act.* 2017;14(58). doi:10.1186/s12966-017-  
446 0510-2.
- 447 45. Salthouse TA. The processing-speed theory of adult age differences in cognition. *Psychol Rev.*  
448 1996;103(3):403-428. doi:10.1037/0033-295X.103.3.403.
- 449 46. Salthouse T a. Aging and measures of processing speed. *Biol Psychol.* 2000;54(1-3):35-54.  
450 doi:10.1016/S0301-0511(00)00052-1.
- 451 47. Madden DJ, Whiting WL, Huettel SA, White LE, Macfall JR, Provenzale JM. Diffusion tensor  
452 imaging of adult age differences in cerebral white matter □: relation to response time.  
453 2004;21:1174-1181. doi:10.1016/j.neuroimage.2003.11.004.
- 454 48. Johnson M a, Diaz MT, Madden DJ. Global versus tract-specific components of cerebral white  
455 matter integrity: relation to adult age and perceptual-motor speed. *Brain Struct Funct.* 2014:2705-  
456 2720. doi:10.1007/s00429-014-0822-9.

- 457 49. Gow AJ, Corley J, Starr JM, Deary IJ. Reverse causation in activity-cognitive ability associations:  
458 The Lothian Birth Cohort 1936. *Psychol Aging*. 2012;27(1):250-255. doi:10.1037/a0024144.
- 459 50. Helmerhorst HJ, Brage S, Warren J, Besson H, Ekelund U. A systematic review of reliability and  
460 objective criterion-related validity of physical activity questionnaires. *Int J Behav Nutr Phys Act*.  
461 2012;9(1):103. doi:10.1186/1479-5868-9-103.
- 462

**Table 1.** Participant demographic information. Values in parentheses are standard deviations.

MMSE = mini mental status examination; Simple RT<sub>mean</sub> = mean RT on the simple RT task.

| Decile                          | 1           | 2           | 3           | 4           | 5           | 6           | 7           |
|---------------------------------|-------------|-------------|-------------|-------------|-------------|-------------|-------------|
| <i>N</i>                        | 28          | 72          | 70          | 59          | 67          | 60          | 43          |
| Age range (years)               | 18 – 27     | 28 – 37     | 38 – 47     | 48 – 57     | 58 – 67     | 68 – 77     | 78 – 87     |
| Sex (male/female)               | 10/18       | 35/37       | 33/37       | 26/33       | 29/38       | 25/35       | 20/23       |
| <b>Highest Education</b>        |             |             |             |             |             |             |             |
| University                      | 19          | 64          | 54          | 40          | 40          | 29          | 15          |
| A' Levels                       | 6           | 4           | 8           | 10          | 15          | 13          | 13          |
| GCSE grade                      | 3           | 4           | 8           | 8           | 9           | 10          | 7           |
| None over 16                    | 0           | 0           | 0           | 1           | 3           | 8           | 8           |
| MMSE                            | 29.18 (1.0) | 29.49 (1.0) | 28.94 (1.2) | 29.05 (1.3) | 28.93 (1.3) | 28.57 (1.5) | 28.02 (1.4) |
| Simple RT <sub>mean</sub> (sec) | .34 (.04)   | .34 (.04)   | .35 (.06)   | .36 (.06)   | .38 (.06)   | .40 (.08)   | .41 (.07)   |

**Table 2.** Mediation models testing the mediation of the relationship between age and white matter integrity (FA) in genu of corpus callosum, anterior limb of internal capsule, external capsule and uncinate fasciculus by physical activity energy expenditure (PAEE). *B* = standardized regression coefficient; *SE* = standard error. Asterisks denote significant mediation effects (for all effects, significance is denoted by a 95% confidence interval [CI] that does not cross zero; False Discovery Rate corrected *p* values < 0.05.).

| White matter tract                | Path <i>a</i><br>(age → PAEE) |             |          |          | Path <i>b</i><br>(PAEE → FA) |             |          |          | Path <i>ab</i><br>(mediation effect) |             |                         |             | Path <i>c'</i><br>(residual age → FA) |          |                         |             | Path <i>c</i><br>(age → FA) |          |  |  |
|-----------------------------------|-------------------------------|-------------|----------|----------|------------------------------|-------------|----------|----------|--------------------------------------|-------------|-------------------------|-------------|---------------------------------------|----------|-------------------------|-------------|-----------------------------|----------|--|--|
|                                   | <i>B</i> [95% CI]             | <i>B</i> SE | <i>t</i> | <i>p</i> | <i>B</i> [95% CI]            | <i>B</i> SE | <i>t</i> | <i>p</i> | <i>B</i> [95% CI]                    | <i>B</i> SE | <i>B</i> [95% CI]       | <i>B</i> SE | <i>t</i>                              | <i>p</i> | <i>B</i> [95% CI]       | <i>B</i> SE | <i>t</i>                    | <i>p</i> |  |  |
| Genu of corpus callosum           | -0.382 [-0.474, -0.291]       | .046        | 8.24     | <.001    | .092 [.019, .164]            | .037        | 2.50     | .017     | -0.035 [-0.066, -0.006]*             | .015        | -0.696 [-0.768, -0.623] | .037        | 18.89                                 | <.001    | -0.731 [-0.798, -0.664] | .034        | 21.34                       | <.001    |  |  |
| Anterior limb of internal capsule | -0.382 [-0.474, -0.291]       | .046        | 8.24     | <.001    | .118 [.014, .221]            | .053        | 2.23     | .033     | -0.045 [-0.093, -0.004]*             | .023        | -0.173 [-0.277, -0.070] | .053        | 3.29                                  | .001     | -0.218 [-0.315, -0.122] | .049        | 4.46                        | <.001    |  |  |
| External capsule                  | -0.382 [-0.474, -0.291]       | .046        | 8.24     | <.001    | .102 [.005, .200]            | .050        | 2.07     | .049     | -0.040 [-0.083, -0.003]*             | .020        | -0.365 [-0.463, -0.268] | .050        | 7.82                                  | <.001    | -0.404 [-0.495, -0.314] | .046        | 8.81                        | <.001    |  |  |
| Uncinate fasciculus               | -0.382 [-0.474, -0.291]       | .046        | 8.24     | <.001    | .141 [.037, .245]            | .053        | 2.66     | .011     | -0.054 [-0.100, -0.013]*             | .022        | -0.138 [-0.242, -0.034] | .053        | 2.61                                  | .012     | -0.192 [-0.289, -0.096] | .049        | 3.91                        | <.001    |  |  |

**Table 3.** Mediation models testing the mediation between age and simple reaction time (RT), by correlation to the white matter integrity (FA) in genu of corpus callosum, anterior limb of internal capsule, external capsule and uncinate fasciculus.  $B$  = standardized regression coefficient; SE = standard error. Asterisks denote significant mediation effects (for all effects, significance is denoted by a 95% confidence interval [CI] that does not cross zero; False Discovery Rate corrected  $p$  values  $< 0.05$ ).

| White matter tract                | Path $a$<br>(age $\rightarrow$ FA) |        |       |       | Path $b$<br>(FA $\rightarrow$ RT) |        |      |      | Path $ab$<br>(mediation effect) |        |                   |        | Path $c'$<br>(residual age $\rightarrow$ RT) |       |                   |        | Path $c$<br>(age $\rightarrow$ RT) |       |  |  |
|-----------------------------------|------------------------------------|--------|-------|-------|-----------------------------------|--------|------|------|---------------------------------|--------|-------------------|--------|----------------------------------------------|-------|-------------------|--------|------------------------------------|-------|--|--|
|                                   | $B$ [95% CI]                       | $B$ SE | $t$   | $p$   | $B$ [95% CI]                      | $B$ SE | $t$  | $p$  | $B$ [95% CI]                    | $B$ SE | $B$ [95% CI]      | $B$ SE | $t$                                          | $p$   | $B$ [95% CI]      | $B$ SE | $t$                                | $p$   |  |  |
| Genu of corpus callosum           | -.731 [-.798, -.664]               | .034   | 21.00 | <.001 | -.205 [-.343, -.067]              | .070   | 2.92 | .004 | .150 [.045, .251]*              | .050   | .213 [.079, .346] | .068   | 3.44                                         | .001  | .362 [.273, .452] | .046   | 7.92                               | <.001 |  |  |
| Anterior limb of internal capsule | -.218 [-.315, -.122]               | .049   | 4.46  | <.001 | -.084 [-.196, .029]               | .067   | 1.46 | .166 | .018 [-.006, .051]              | .014   | .344 [.252, .437] | .047   | 7.30                                         | <.001 | .362 [.273, .452] | .046   | 7.92                               | <.001 |  |  |
| External capsule                  | -.404 [-.504, -.305]               | .051   | 8.00  | <.001 | -.039 [-.150, .072]               | .053   | .69  | .525 | .016 [-.023, .061]              | .022   | .347 [.247, .447] | .051   | 6.80                                         | <.001 | .362 [.273, .452] | .046   | 7.92                               | <.001 |  |  |
| Uncinate fasciculus               | -.192 [-.290, -.095]               | .050   | 3.87  | <.001 | -.013 [-.101, .075]               | .045   | .30  | .768 | .003 [-.014, .020]              | .009   | .360 [.269, .451] | .046   | 7.75                                         | <.001 | .362 [.273, .452] | .046   | 7.92                               | <.001 |  |  |

## Table legends

**Table 1.** Participant demographic information. Values in parentheses are standard deviations.

MMSE = mini mental status examination; Simple RT<sub>mean</sub> = mean RT on the simple RT task.

**Table 2.** Mediation models testing the mediation of the relationship between age and white matter integrity (FA) in genu of corpus callosum, anterior limb of internal capsule, external capsule and uncinated fasciculus by physical activity energy expenditure (PAEE). *B* = standardized regression coefficient; SE = standard error. Asterisks denote significant mediation effects (for all effects, significance is denoted by a 95% confidence interval [CI] that does not cross zero; False Discovery Rate corrected *p* values < 0.05.).

**Table 3.** Mediation models testing the mediation between age and simple reaction time (RT), by correlation to the white matter integrity (FA) in genu of corpus callosum, anterior limb of internal capsule, external capsule and uncinated fasciculus. *B* = standardized regression coefficient; SE = standard error. Asterisks denote significant mediation effects (for all effects, significance is denoted by a 95% confidence interval [CI] that does not cross zero; False Discovery Rate corrected *p* values < 0.05).

## Figure captions

**Figure 1. A.** The effect of age on total physical activity energy expenditure (PAEE). **B.** The effect of age on PAEE subtypes of home-, work-, leisure- and commuting-related activities.



**Figure 2. A.** The relationship between white matter integrity (FA) and age (black dots) and age controlled for PAEE (red dots) in genu of corpus callosum, external capsule, anterior limb of internal capsule and uncinate fasciculus. FA decreases gradually with age within all of the analysed white matter tracts: GCC:  $r = -.731$ ,  $p < .001$ ; EC:  $r = -.404$ ,  $p < .001$ ; ALIC:  $r = -.218$ ,  $p < .001$ ; UNC:  $r = -.192$ ,  $p < .001$ . The detrimental effect of age on FA is diminished in all of the analysed tracts when PAEE is partialled out from age: GCC:  $r = -.688$ ,  $p < .001$ ; EC:  $r = -.348$ ,  $p < .001$ ; ALIC:  $r = -.163$ ,  $p = .001$ ; UNC:  $r = -.130$ ,  $p = .009$ . The results indicate a positive relationship between higher physical activity and age-related differences in white matter microstructure. **B.** The relationship between reaction time and age (black dots) and age controlled for white matter integrity (FA) in genu of corpus callosum (red dots). Reaction times become gradually slower with age:  $r = .362$ ,  $p < .001$ . The effect of age on reaction time is diminished when FA in genu of the corpus callosum is partialled out from age:  $r = .156$ ,  $p = .002$ . The results indicate a positive relationship between white matter integrity in anterior corpus callosum and age-related differences in reaction time performance. **C.** White matter tract ROIs from JHU FA atlas. Tracts which survive the first stage of mediation analysis (genu, anterior limb of the internal capsule, and the external capsule) are rendered in (left to right) superior axial, sagittal, and oblique views. Genu – red; anterior limb of internal capsule – blue; external capsule – green; uncinate fasciculus – orange. **D.** Schematic representation of the mediation paths. PAEE mediates the effect of age on FA in genu of corpus callosum. **E.** FA in genu of corpus callosum mediates the effect of age on reaction time.

**A**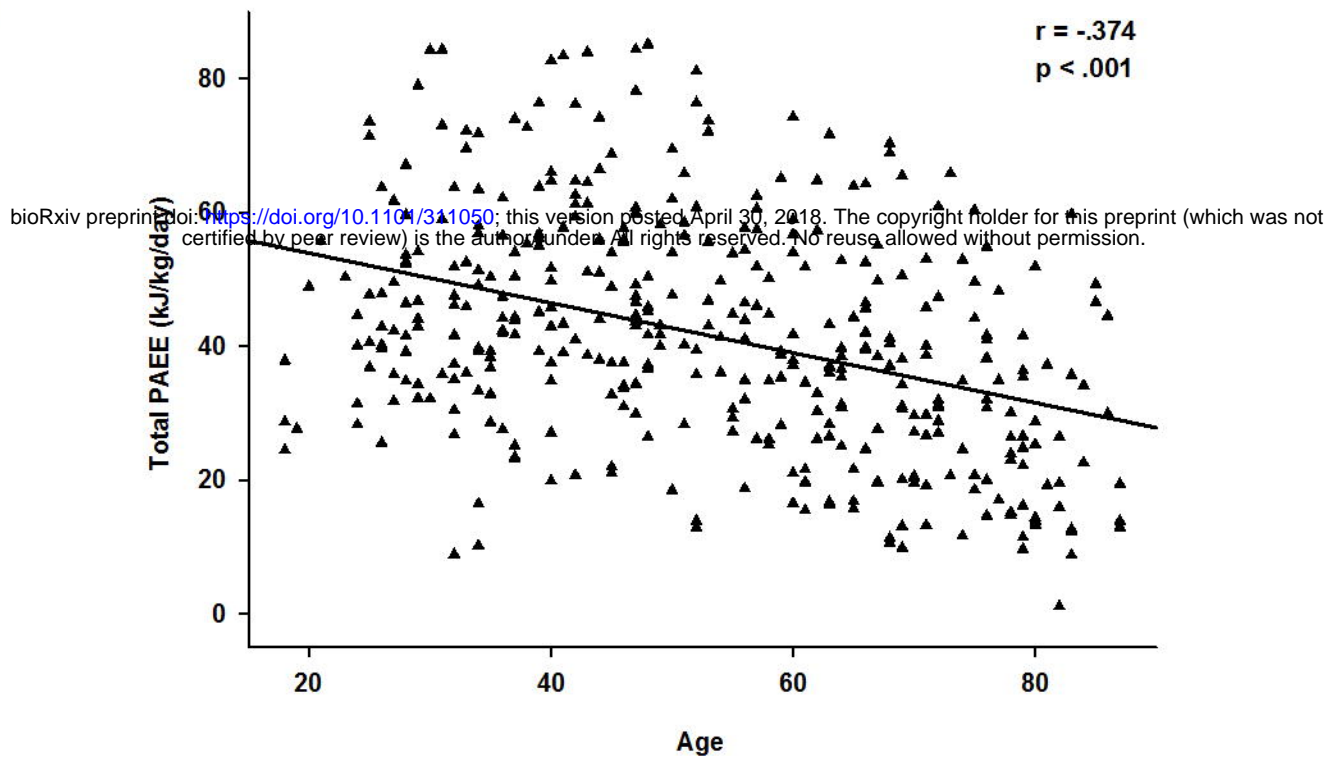**B**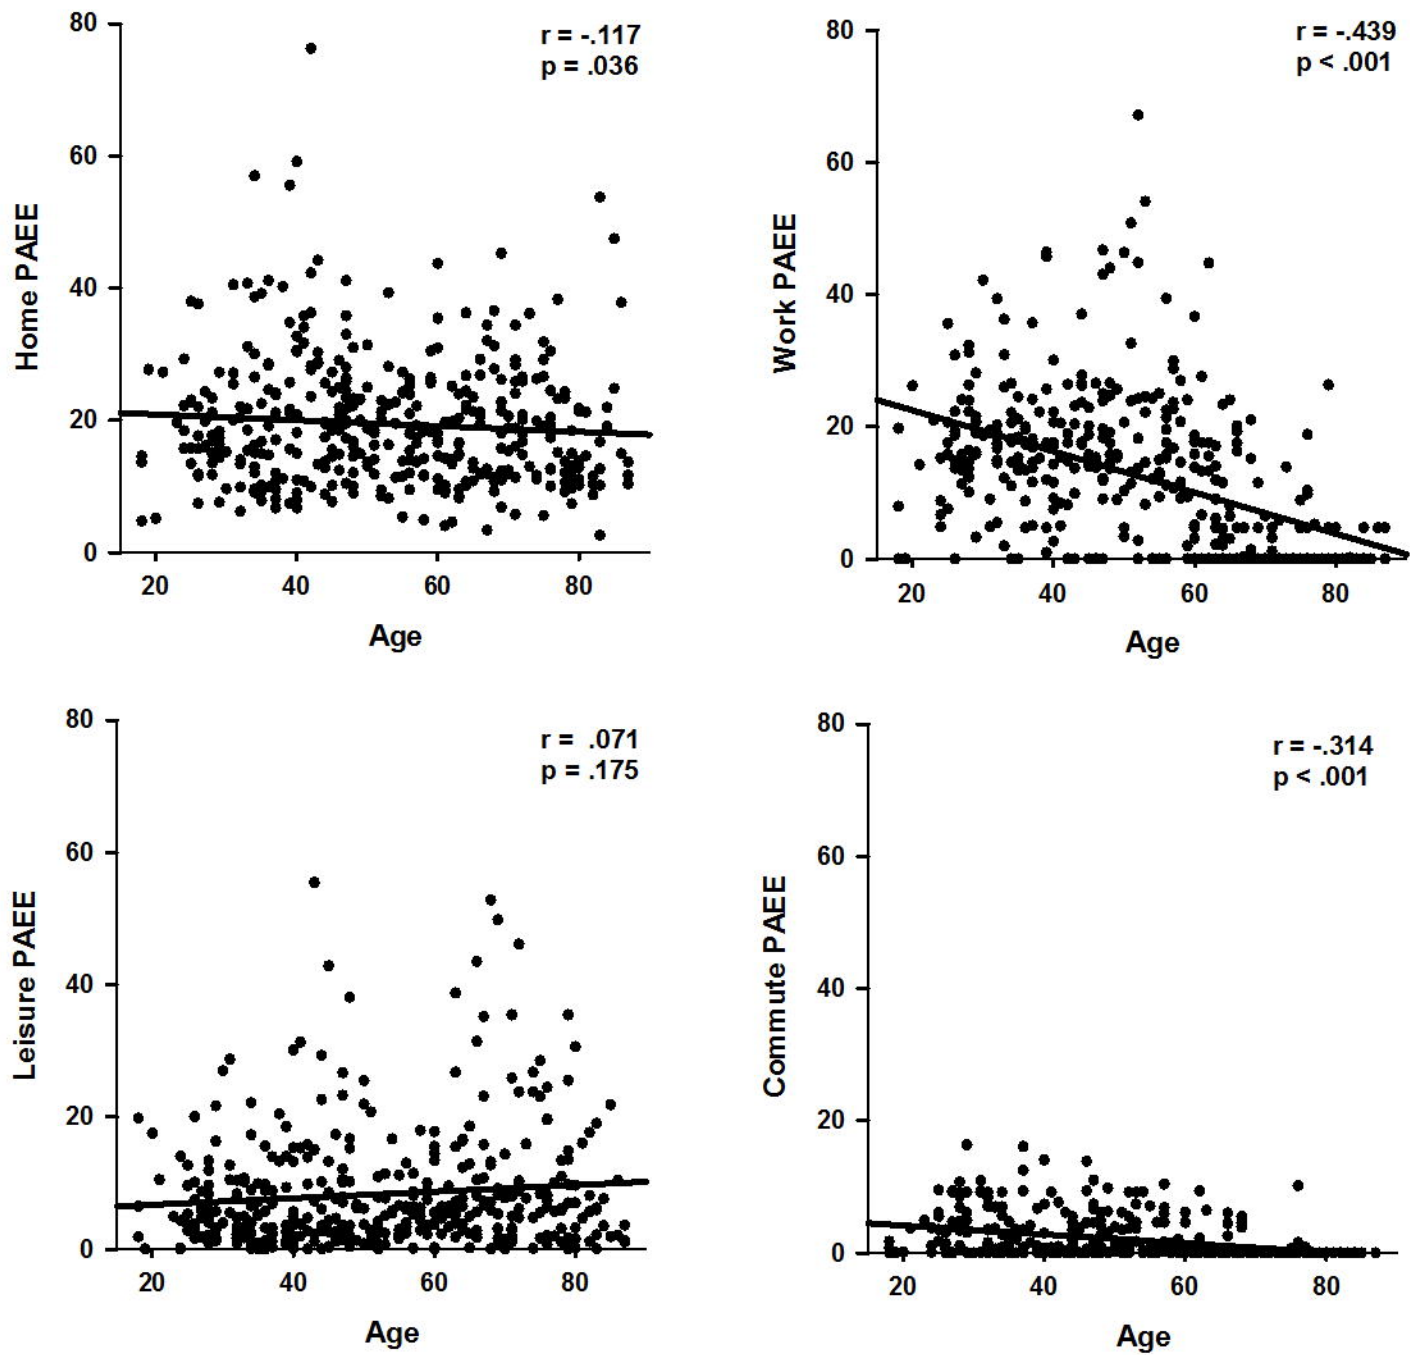

**A**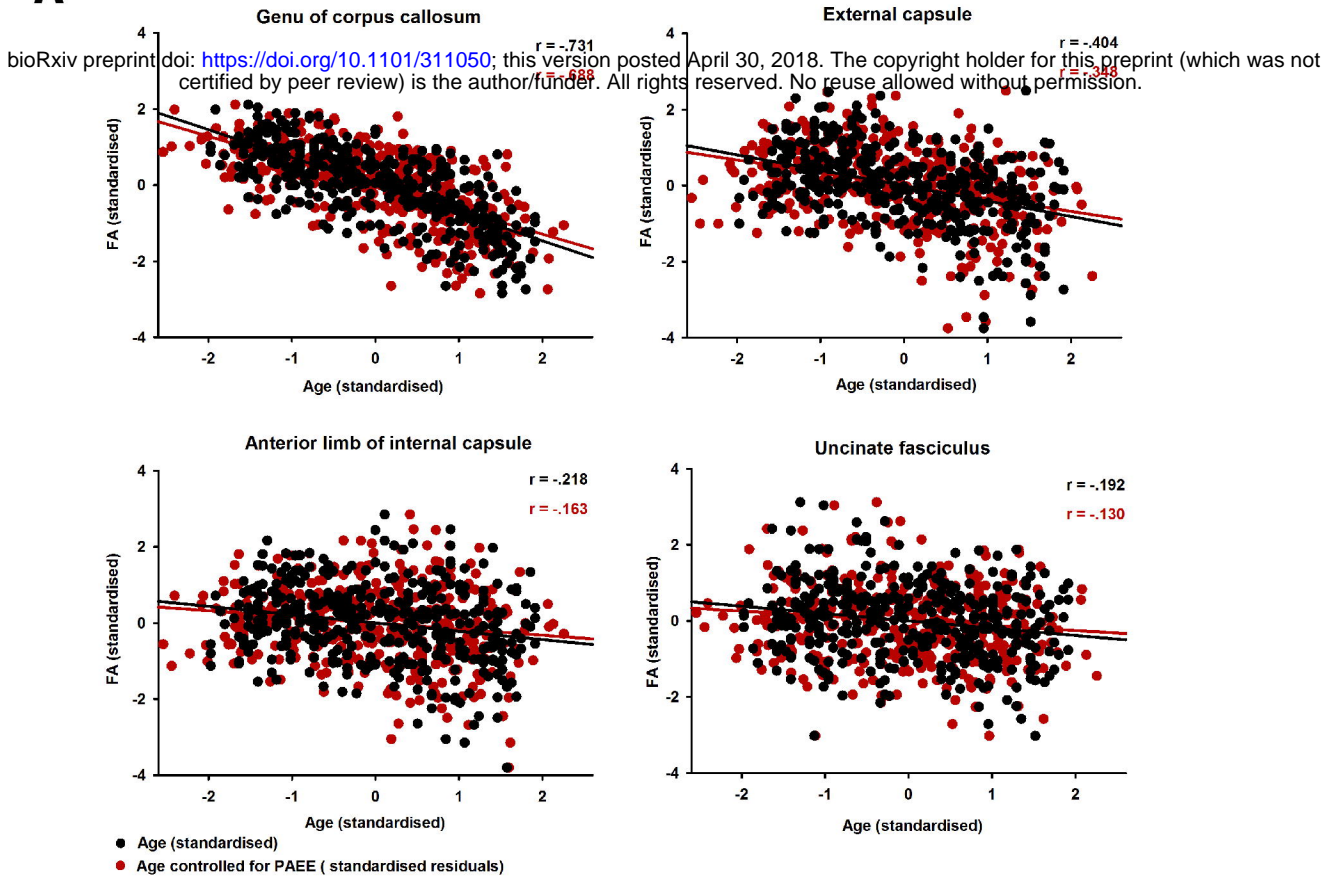**B**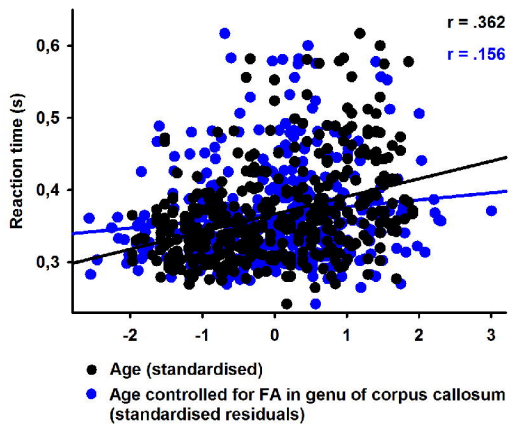**C**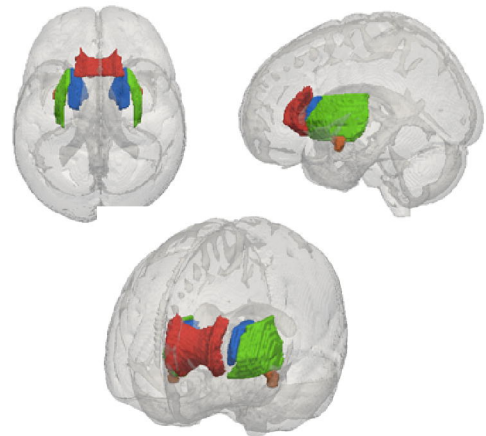**D**

*a*  $B = -.382 [-.474, .291]$   $SE = .046$ ,  $t = 8.24$ ,  $p < .001$   
*b*  $B = .092 [.019, .164]$   $SE = .037$ ,  $t = 2.50$ ,  $p = .017$   
*ab*  $B = .035 [.066, .006]$   $SE = .015$   
*c'*  $B = -.696 [-.768, -.623]$   $SE = .037$ ,  $t = 18.89$ ,  $p < .001$   
*c*  $B = -.731 [-.798, -.664]$   $SE = .034$ ,  $t = 21.34$ ,  $p < .001$

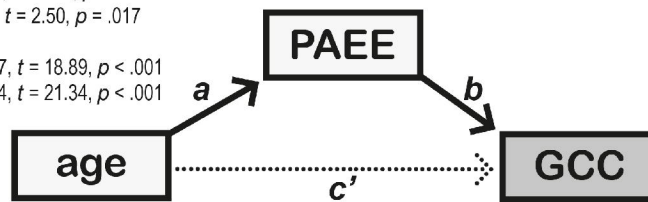**E**

*a*  $B = -.731 [-.798, -.664]$   $SE = .034$ ,  $t = 21.00$ ,  $p < .001$   
*b*  $B = -.205 [-.338, -.064]$   $SE = .068$ ,  $t = 2.92$ ,  $p = .004$   
*ab*  $B = .150 [.053, .255]$   $SE = .051$   
*c'*  $B = .213 [.079, .346]$   $SE = .068$ ,  $t = 3.44$ ,  $p = .001$   
*c*  $B = .362 [.270, .454]$   $SE = .047$ ,  $t = 7.92$ ,  $p < .001$

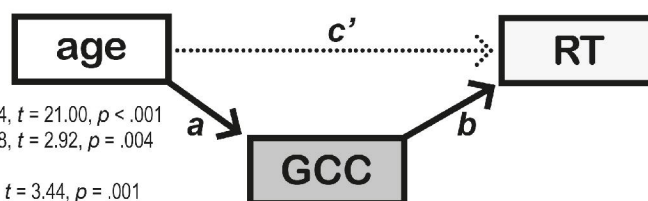

Source: http://biorxiv.org/content/10.1101/311050v1.full.pdf
